# Supplementary material for: Molecular characterization, antimicrobial resistance and clinico-bioinformatics approaches to address the problem of extended-spectrum β-lactamase-producing Escherichia coli in western Saudi Arabia
Source: PubMed Central journal article supplement (PMC6172265; doi:10.1038/s41598-018-33093-8), 2018-10-04
Supplement: 41598_2018_33093_MOESM1_ESM.pdf [file 41598_2018_33093_MOESM1_ESM.pdf]

**Molecular characterization, antimicrobial resistance and clinico-bioinformatics approaches to address the problem of extended-spectrum  $\beta$ -lactamase-producing *Escherichia coli* in western Saudi Arabia**

Muhammad Yasir<sup>1\*</sup>, Abeer M. Ajlan<sup>1,2</sup>, Shazi Shakil<sup>3,4,5</sup>, Asif A. Jiman-Fatani<sup>6,7</sup>, Saad B. Almasaudi<sup>2</sup>, Muhammad Farman<sup>1,2</sup>, Zainah M. Baazeem<sup>1</sup>, Rnda Baabdullah<sup>1</sup>, Maha Alawi<sup>6,8</sup>, Nabeela Al-Abdullah<sup>8,9</sup>, Nashat A. Ismaeel<sup>6</sup>, Hani A. Shukri<sup>7</sup>, Esam I. Azhar<sup>1,5</sup>

<sup>1</sup>Special Infectious Agents Unit, King Fahd Medical Research Center, King Abdulaziz University, Jeddah, Saudi Arabia

<sup>2</sup>Biology Department, Faculty of Science, King Abdulaziz University, Jeddah 21589, Saudi Arabia

<sup>3</sup>Center of Innovation in Personalized Medicine, King Abdulaziz University, Jeddah, Saudi Arabia

<sup>4</sup>Center of Excellence in Genomic Medicine Research, King Abdulaziz University, Jeddah, Saudi Arabia

<sup>5</sup>Department of Medical Laboratory Technology, Faculty of Applied Medical Sciences, King Abdulaziz University, Jeddah, Saudi Arabia

<sup>6</sup>Department of Medical Microbiology and Parasitology, Faculty of Medicine, King Abdulaziz University, Jeddah, Saudi Arabia

<sup>7</sup>Clinical and molecular microbiology laboratories King Abdulaziz University Hospital, Jeddah, Saudi Arabia

<sup>8</sup>Infection Control & Environmental Health Unit, King Abdulaziz University Hospital, King Abdulaziz University, Jeddah, Saudi Arabia

<sup>9</sup>Department of Public Health, Faculty of Nursing, King Abdulaziz University, Jeddah, Saudi Arabia

\*Corresponding author: Muhammad Yasir

E mail: [yasirkhattak.mrl@gmail.com](mailto:yasirkhattak.mrl@gmail.com)

[Ph: 00966563202241](tel:00966563202241)

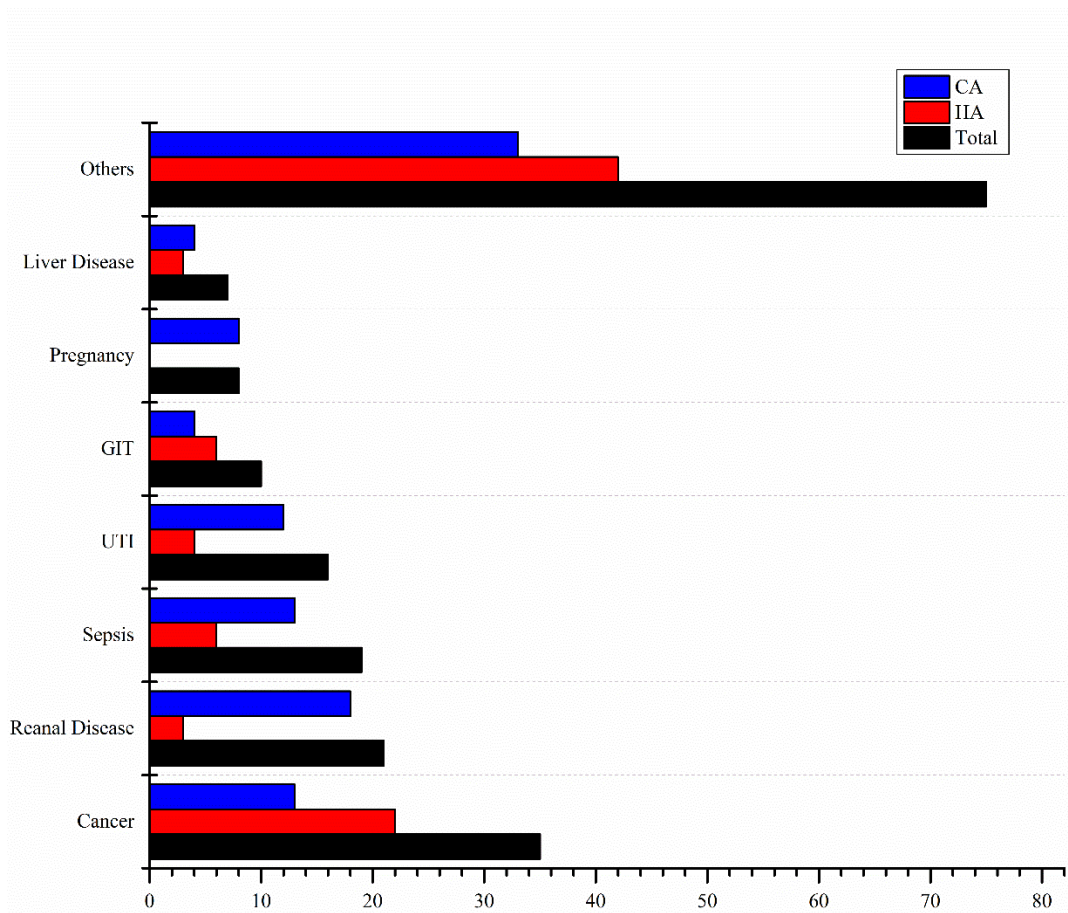

**Fig. S1.** Distribution of the community acquired (CA) and hospital acquired (HA) infection of ESBL-positive *E. coli* in different disease patients. The x-axis values expressed the number of isolates.



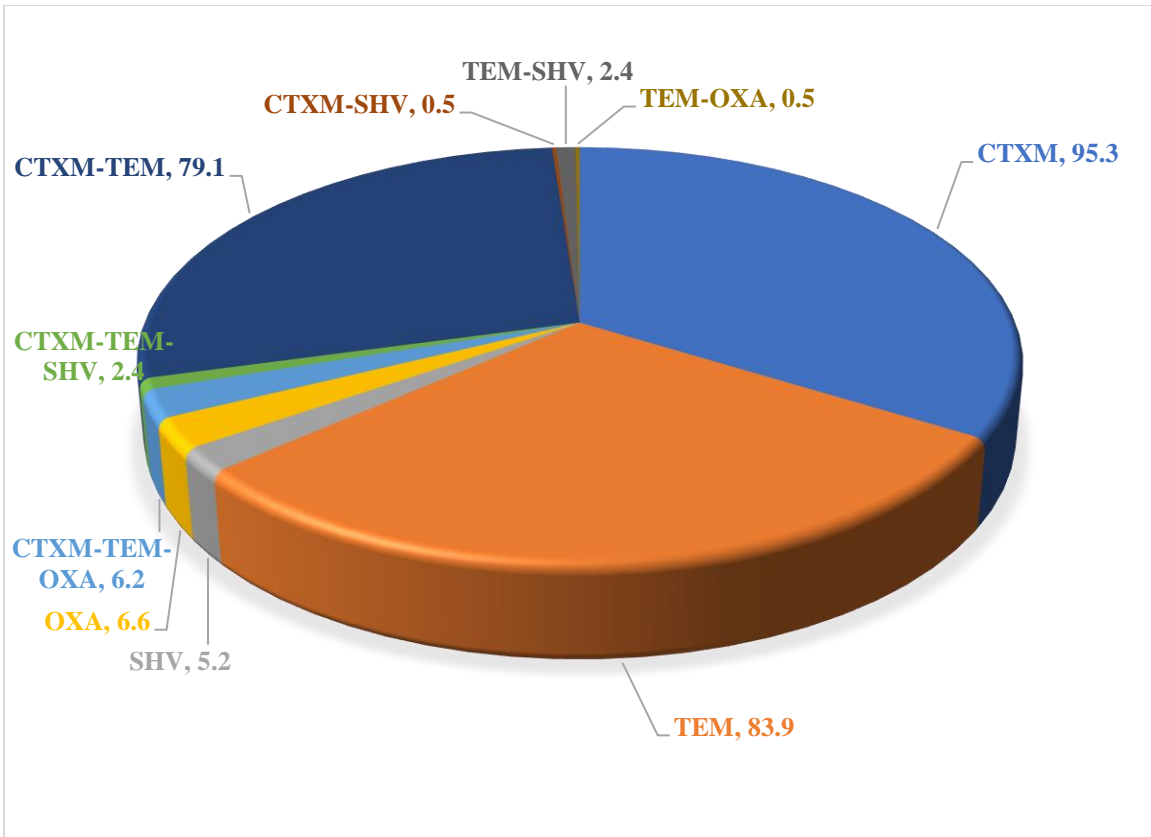

**Fig. S3.** Percentage distribution of the ESBL genes in the ESBL-positive *E. coli* isolates.

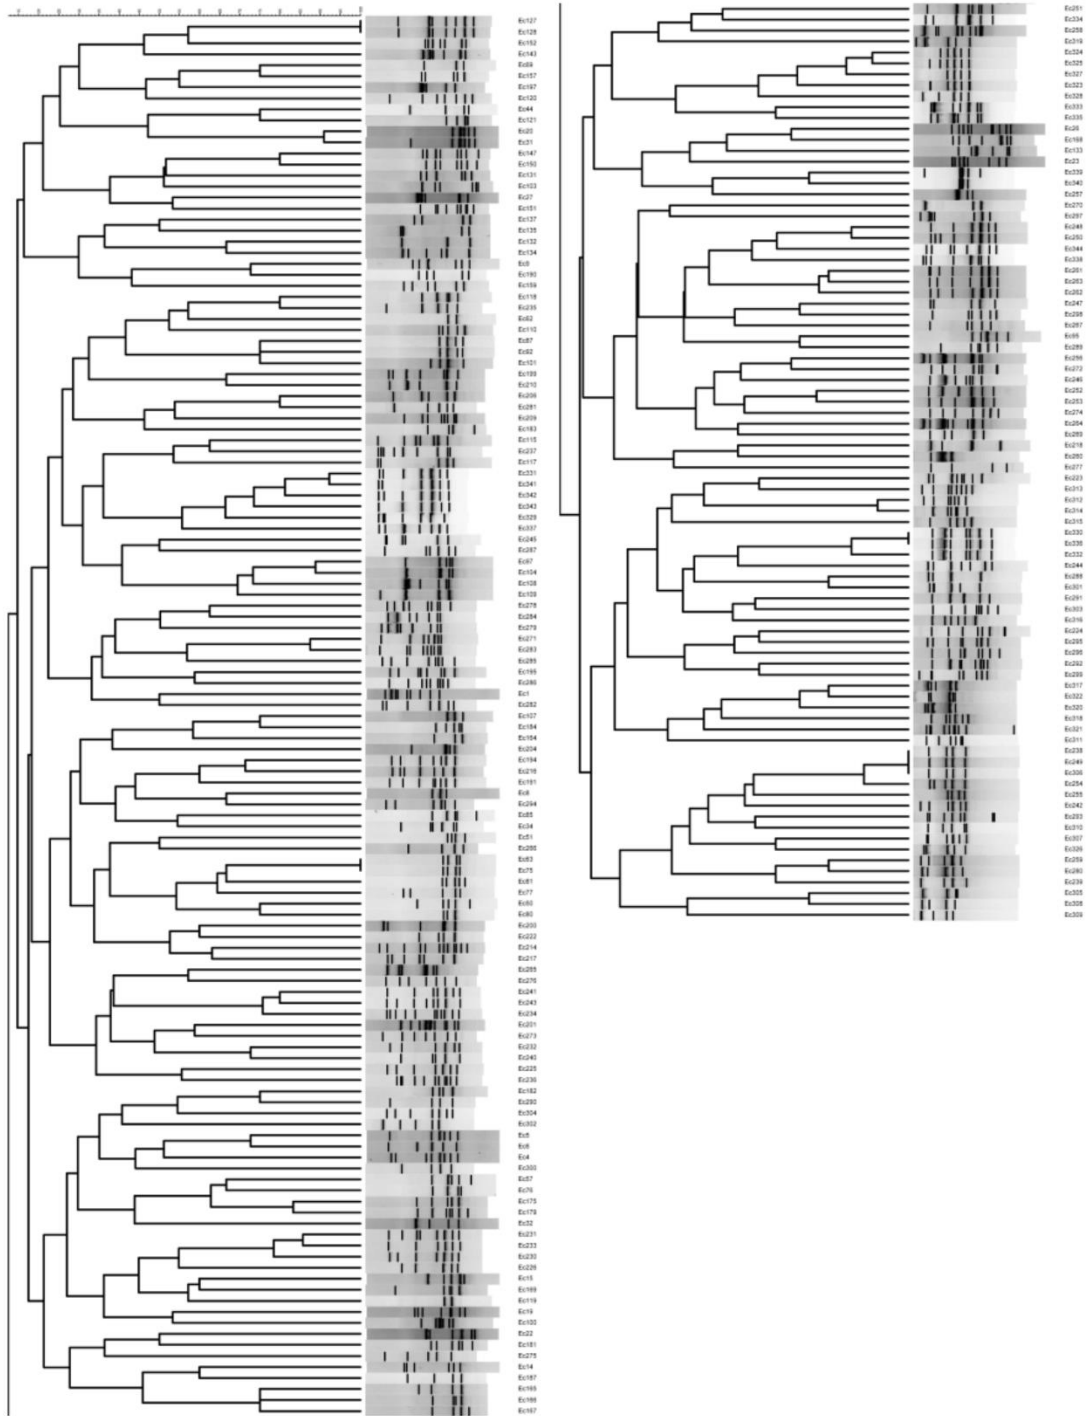

**Fig. S4.** UPGMA dendrogram of the ERIC-PCR bands pattern of the ESB-positive *E. coli* isolates.

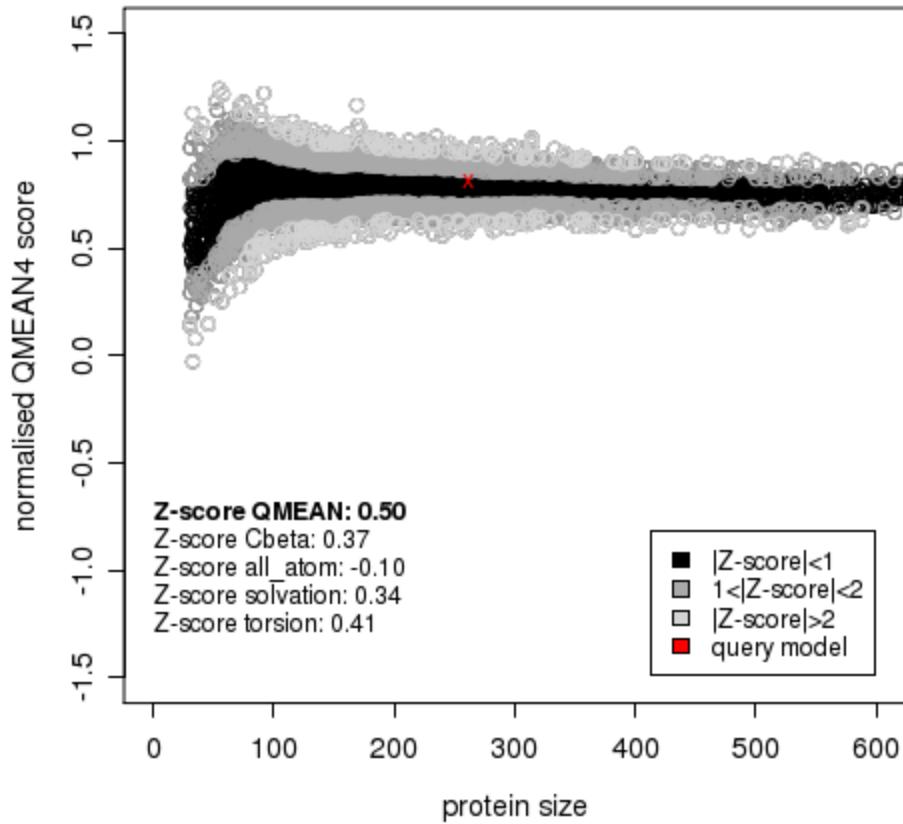

**Fig. S5.** Plot representing normalized “QMEAN4” scores versus protein-size to assess the bacterial enzyme model reliability with reference to a non-redundant set of PDB-structures.

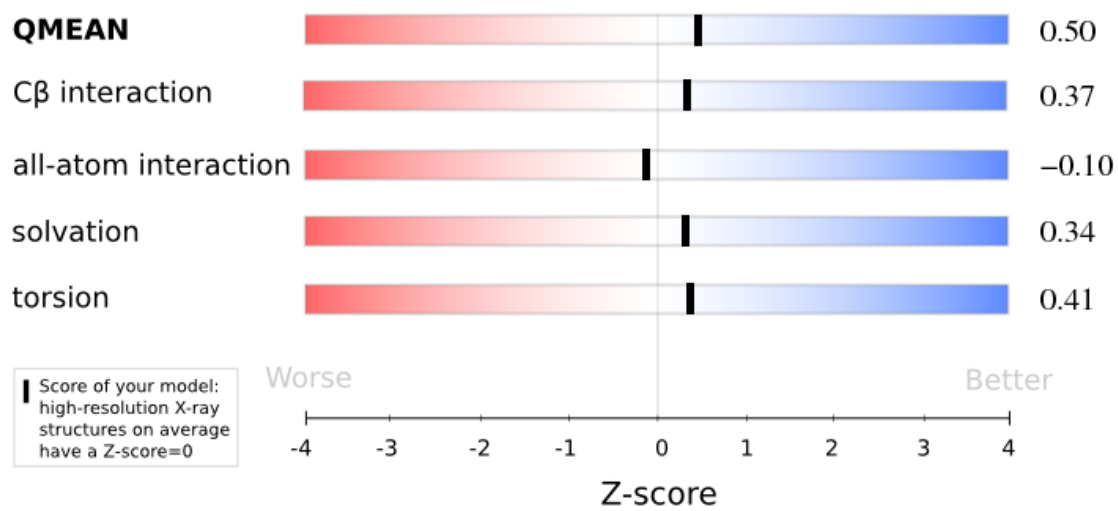

**Fig. S6.** ‘Slider Plot’ representing Z-score values for C $\beta$  interaction, all-atom interaction, solvation and torsion corresponding to the bacterial enzyme model.
